1 **EVALUATION OF FEMALE SEXUAL FUNCTION IN PERSONS WITH TYPE 2**  
2 **DIABETES MELLITUS SEEN IN A TERTIARY HOSPITAL IN SOUTH EAST**  
3 **NIGERIA WITH EMPHASIS ON ITS FREQUENCY AND PREDICTORS**

4 Ezeani Ignatius U<sup>1</sup>, Onyeonoro Ugochukwu U<sup>2</sup>, UgwuTheophilus E<sup>3</sup>

5

6 <sup>1</sup>Division of Endocrinology, Diabetes and Metabolism, Department of Internal Medicine,  
7 Federal Medical Center, Umuahia, Abia state, Nigeria;

8 <sup>2</sup>Department of Community Medicine, Federal Medical Center, Umuahia, Abia state, Nigeria;

9 <sup>3</sup>Department of Internal Medicine, Enugu State University

10 Teaching Hospital, Enugu, Nigeria

11

12 **Correspondence:**

13 Dr Ezeani Ignatius U.

14 Department of Medicine

15 Federal Medical Center,

16 P.M.B 7001, Umuahia, Abia state, Nigeria.

17 Email: ignatiusez@yahoo.com

18 Tel: +2348060692131.

19

20 **Abstract**

21 **Background:** women with diabetes are at increased risk of sexual problems, however, this  
22 problem is under reported hence the need for this study.

23 **Methods:** This was a cross sectional case-controlled study. Seventy-five consenting females  
24 with type 2 DM were enrolled from the Diabetes Clinic of the Federal Medical Center,  
25 Umuahia, while Seventy-five persons which included hospital workers and female companions  
26 of subjects were recruited as control. Sexual dysfunction in both groups was diagnosed and  
27 characterized using the female sexual function index (FSFI). Data obtained from this study was  
28 presented as Mean±SD and analyzed using SPSS 17 software.

29 **Results:** The mean age of the T2DM group and control were 44.5 years and 38.9 years  
30 respectively. The mean total female sexual score (TFSS) was 22.10±6.66 in the T2DM subjects,

31 while in the control subjects, it was  $22.43 \pm 5.29$ . This was not statistically significant. The FSF  
32 scores in the desire, lubrication and orgasm domains were all lower in the diabetic women and  
33 this was statistically significant ( $P < 0.05$ ). The domains of pain and arousal were also lower in  
34 the diabetic women although this was not statistically significant ( $P > 0.05$ ). The proportion of  
35 diabetic females who reported problems in the arousal, lubrication, orgasm and pain domains  
36 were higher (40.0, 36.4, 32.7, 29.1) than the controls (27.9, 16.2, 14.7, 19.1)  $\{p < 0.05\}$ .

37 **Conclusion:** The prevalence of female sexual dysfunction was high from our study. Similarly, the  
38 Female Sexual Function Index (FSFI) score was low in women with diabetes when compared with  
39 controls. The domains of arousal, pain, orgasm and satisfaction were the most affected domains in  
40 subjects with DM Age, marital status, BMI, FBS and hypertension were predictive of sexual dysfunction  
41 in the diabetic women.

42

43 **KEYWORDS:** Female Sexual function, Diabetes mellitus, Frequency, Predictors, South east Nigeria,  
44 Dysfunction

45

## 46 **1. Introduction:**

47 Diabetes Mellitus occurs throughout the world. According to the International Diabetes  
48 Federation (IDF) eighth atlas, about 425 million people worldwide, or 8.8% of adults 20-79  
49 years, are estimated to be living with diabetes mellitus in 2017.<sup>1</sup> There is a relationship between  
50 diabetes and sexual dysfunction (SD): this has been noticed in both male and female.<sup>2,3,4</sup> Sexual  
51 dysfunctions in women with diabetes mellitus are often under reported when compared with  
52 men with diabetes. To the best of our knowledge, there are few studies in our environment that  
53 have focused on female sexual dysfunction, even though more cases are seen in the outpatient  
54 clinics than the number reported if any. Some probable reasons for this observation includes: 1.  
55 Women are still viewed as sexual objects in some societies and as a result of this, they are  
56 expected to accept sex and sexuality as a prelude for conception. Secondly, some societies view  
57 women who raise the issue of their sexual dysfunctions as promiscuous, this inadvertently will  
58 make them to conceal these challenges for fear of societal ridicule. In the early nineteenth

59 century, before the discovery of insulin, sexuality was not a common topic of discourse neither  
60 was it an area that had benefited from extensive research. The initially conceived idea about  
61 sexual dysfunction in both sexes was, “If you do not ask about it, it does not exist.” The  
62 connection between diabetes and sexual function only began to be highlighted about a century  
63 ago unfortunately; more attention was given to male dysfunction. Furthermore, most of the  
64 publications placed emphasis on the effect of diabetes on male sexual function, not until the  
65 famous reproductive endocrinologist: Robert Kolodny reported the relationship between  
66 diabetes and female sexual dysfunction.<sup>5</sup> There are several causes of female SD and these  
67 includes: vascular, neurological, endocrine and psychogenic causes, all these factors have been  
68 identified in the aetiology of female sexual dysfunction.<sup>6</sup> Unlike male SD, female SD is majorly  
69 influenced by psychogenic factors such as depression whose occurrence is more than double in  
70 women when compared to their male counterparts.<sup>6</sup>

71 The probability of a woman with diabetes developing sexual dysfunction is higher when  
72 compared with those without DM. Sexual problems in women with diabetes could present in  
73 various ways. Some of these problems include dyspareunia, inadequate vaginal lubrication  
74 reduced arousal and desire. Even though there are studies on this subject from other parts of the  
75 world, literature on this subject from Nigeria is scarce, hence the need for this study.

76 **1.1 Aims:** The aim of this study is to examine the prevalence of sexual dysfunction in women  
77 with type 2 diabetes mellitus, compare the prevalence of sexual dysfunction in women with  
78 diabetes to that of a control group and describe the predictors of sexual dysfunction in women  
79 with diabetes.

80 **2. Methodology:**

81 This was a cross sectional case-controlled study. Seventy-five consenting females with type 2  
82 DM were enrolled from the Diabetes Clinic of the Federal Medical Center, Umuahia, Abia state.  
83 The inclusion criteria include subjects married for atleast 1year and have had a stable marital  
84 relationship. Patients who were on drugs like beta blockers and centrally acting drugs like alpha  
85 methyldopa known to cause female SD were excluded. Seventy-five persons which included  
86 hospital workers and female companions of subjects were recruited as control (these subjects  
87 were screened for diabetes). The questionnaire was administered by both male and female  
88 medical personnel in the diabetic unit who informed the subjects about the research and its  
89 objectives and they were assured that confidentiality will be maintained during and after the  
90 study. Information given was used only for the purpose of this study. All the staff working for  
91 the study were trained and examined before the enrollment. Information obtained from study  
92 and control subjects included age, marital status, educational status, employment history, drug  
93 history, type and duration of DM, height, weight, body mass index, waist circumference, hip  
94 circumference, and blood pressure. The weight obtained was recorded in kilograms (kg) to the  
95 nearest 0.1kg and the height recorded in meters (m) to the nearest 0.01m. The body mass index  
96 was calculated as the weight in kg divided by the square of the height in metres.<sup>7</sup>The waist  
97 circumference was measured using a non-stretch metric tape and taken at the mid-point between  
98 the rib cage and iliac crest while hip circumference was taken as the maximal circumference of  
99 the buttocks.<sup>8</sup>

100 Sexual dysfunction in both groups was diagnosed and characterized using the female sexual  
101 function index (FSFI)<sup>9</sup> which is a specific, sensitive and standardized tool for diagnosing female  
102 SD. The index is a 19-item questionnaire providing scores on six domains of sexual function  
103 (desire, arousal, lubrication, orgasm, satisfaction, and pain) as well as a total score.<sup>9,10,11</sup>In  
104 women, the minimum and maximum scores are respectively 2 and 36. Women with a score

105 under 26 were classified as having sexual dysfunction. This cut-off point was the same figure  
106 validated by other researchers. It is a well-accepted self-report instrument for assessing sexual  
107 function of women world-wide. The data obtained from this study was presented as Mean±SD  
108 and analyzed using SPSS 17 software.

### 109 **3. Results**

110 Between October 2016 and September 2017, 150 married women were studied (seventy-five  
111 diabetic women and seventy-five controls), but one hundred and twenty three returned there  
112 questionnaire. They were grouped into a diabetic group ( $n=55$ ) and a non-diabetic group  
113 ( $n=68$ ). Women with diabetes mellitus were those attending the Diabetes and Endocrinology  
114 clinics at the Federal Medical Center, Umuahia, Abia state and non-diabetic women were their  
115 female companions and health workers at the medical center. The mean age of the T2DM group  
116 and control were 44.5 years and 38.9 years respectively. This was statistically significant  
117 ( $p=0.04$ , Table 2). The proportion of persons who had some form of education was higher in the  
118 control subjects than in patients with T2DM and this was statistically significant ( $p=0.02$ ). A  
119 greater majority of the control subjects were either self-employed or civil servants compared  
120 with the subjects with T2DM, although this was not statistically significant ( $p=0.24$ ). A higher  
121 proportion of the control subjects were either overweight or obese when compared with subjects  
122 with T2DM, this was not statistically significant ( $p=0.33$ ). The prevalence of SD in this study  
123 was 79.2% and the mean age was  $47.3\pm 7.9$ . The proportion of diabetic females who reported  
124 problems in the arousal, lubrication, orgasm and pain domains was 40.0, 36.4, 32.7 and 29.1  
125 respectively. On the other hand the proportion in the control was 27.9, 16.2, 14.7 and 19.1  
126 respectively. Age, marital status, BMI, FBS and hypertension are predictive of sexual  
127 dysfunction in the diabetic women (OR: 1.80, 1.15, 1.67, 1.00, 8.51).

#### 128        **4. Discussion**

129        Sexual dysfunction (SD) is known to be common in male and females with DM, although it is  
130        grossly under reported in females with DM. The prevalence of female sexual dysfunction (FSD)  
131        in this study was 29.1%. This is much higher than the 6.6% reported by Unadike et al<sup>12</sup> though  
132        it is almost same as the prevalence reported by Enzlin et al<sup>13</sup> in the population they studied.  
133        Although the study by Unadike et al was performed in a region with a the same financial  
134        and educational background as ours, the low prevalence he reported may be as a result of  
135        changing perceptions by women (as a result of increasing modernization) on issues bordering on  
136        sexual challenges considering the fact that his study was carried out almost a decade ago.  
137        Women are becoming increasingly more informed and confident in expressing their opinions:  
138        this could be responsible for obvious increase in prevalence. Other studies reported even higher  
139        prevalence compared to findings in this study.<sup>14,15</sup>The complications of diabetes seem to have a  
140        much bigger influence on sexual problems as noted in our study.

141        The mean (SD) ages of subjects with T2DM were higher than that of the controls and this was  
142        statistically significant: increasing age was associated with the development of FSD. In studies  
143        from other countries, the age of the study population may have affected the FSD prevalence in  
144        such climes; a Nigerian study had much older subjects<sup>16</sup> while a Belgium study  
145        enrolled the youngest participants.<sup>13</sup> In our study, both the prevalence and age were  
146        moderate, similar to what was reported in a US study. Age has a significant impact on the  
147        sexual function of a woman as increasing age may be associated with declining sexual interest.  
148        With aging, women tend to experience hormonal changes such as estrogen/androgen reduction,  
149        which frequently cause significant bodily and emotional unpleasant effects on sexual function.<sup>17</sup>

150 This could explain the reason behind the varying prevalence rates of FSD noted in different  
151 studies.

152 The mean total female sexual function index (FSFI) score in T2DM subjects and their control  
153 were 22.1 and 22.4 respectively ( $p>0.05$ ): this is in keeping with reports from other  
154 studies.<sup>18,19,20</sup>The FSF scores in the desire, lubrication and orgasm domains were all lower in the  
155 diabetic women and this was statistically significant ( $P< 0.05$ ). The domains of pain and arousal  
156 were also lower in the diabetic women although this was not statistically significant( $P >0.05$ ). In  
157 the diabetic women, majority of subjects reported problems in the domains of arousal,  
158 lubrication, orgasm, satisfaction and pain when compared to the control group. This finding is in  
159 keeping with results from a study by Olarinoye et al<sup>21</sup> who in a study involving fifty one type 2  
160 DM women, noted arousal, pain, orgasm and satisfaction as the most affected domains.

161 In absolute percentage, the proportion of diabetic females who reported problems in the arousal,  
162 lubrication, orgasm and pain domains were higher than the controls . These differences were  
163 statistically significant in the two domains of orgasm and lubrication ( $p < 0.05$ ). This value is  
164 higher than results of a Malaysian study .<sup>22</sup> This difference could be attributed to the difference  
165 in culture, ideologies and religion: system of secularism in South East Nigeria with large  
166 inhabitants of Christians as compared with a predominantly Muslim population in the Malaysian  
167 study. This will influence expression of sexual opinions and thoughts and inexorably, cause the  
168 women to suppress topics relating to their sexuality for fear of its negative perception from the  
169 society. Thus, these sexual problems may go unreported.

170 Age, marital status, BMI, FBS and hypertension are predictive of sexual dysfunction in the  
171 diabetic women . Higher BMI class is predictive of sexual dysfunction in the diabetic women:  
172 this finding is similar to reports from a New York study.<sup>23</sup>In a study done in China, similar trend

173 was reported although this was not seen in the non diabetic control group. Although study  
174 comparison between nations is problematic because varying definition and research methods  
175 were employed in these various studies. Another interesting finding from this study is the lower  
176 BMI and difference in HC and WC in patients with diabetes when compared to the control  
177 group. A possible explanation could be that in a patient with diabetes, a vital aspect of  
178 management is lifestyle intervention with one goal being weight reduction. Therefore, it may not  
179 be uncommon to see patients with T2DM having a lower BMI, difference in HC and WC. We  
180 feel that there is need for more studies to further investigate the mechanisms of obesity and  
181 sexual dysfunction in diabetic women.

182 The strength of our study lies in the use of the FSFI questionnaire, a validated instrument to  
183 assess female sexual function which has been extensively used in studies. Limitations that arose  
184 from this study include: This was a small study which should be considered exploratory, no  
185 multiple comparison adjustments were made in the analysis; therefore a larger and specifically  
186 designed study is needed to evaluate other clinical and metabolic abnormalities in patients with  
187 SD Secondly, we did not consider sex hormones, history of reproductive system diseases and  
188 other factors in this study.

## 189 **5. Conclusion**

190 The prevalence of female sexual dysfunction was high from our study. Similarly, the Female Sexual  
191 Function Index (FSFI) score was low in women with diabetes when compared with controls. The  
192 domains of arousal, pain, orgasm and satisfaction were the most affected domains in subjects with DM  
193 Age, marital status, BMI, FBS and hypertension were predictive of sexual dysfunction in the diabetic  
194 women. There may be need for more research to look at the influence of diabetes type on sexual  
195 function in order to explore various treatment strategies for this group of women.

196



197 **Consent statement**

198 Written informed consent was obtained from the patient for publication of this research article.

199 A copy of the written consent is available for review by the Editor-in-Chief of this journal.

200 **Declarations**

201 Ethical approval: The Ethics and Research committee of the Federal Medical Center, Umuahia  
202 gave the ethical approval. The patients interviewed in this study did it voluntarily, and wrote an  
203 informed consent.

204 Source of funding: none

205 **Authors contribution**

206 EI conceived of the study, carried out the sequence alignment and drafted the manuscript. OU  
207 and TU participated in the sequence alignment, design of the study and helped to draft the  
208 manuscript. All authors read and approved the final manuscript.

209 **Acknowledgements**

210 We thank all the staff in the department of Internal Medicine Federal Medical Center, Umuahia.  
211 who contributed towards the article by making substantial contributions to conception and  
212 revision of manuscript for important intellectual content.

213 **Conflict of Interest:** we declare that the submitted work was carried out in the absence of any  
214 personal, professional or financial relationships that could potentially be construed as a conflict  
215 of interest.

216

217 **References:**

- 218 1. International Diabetes Federation Diabetes Atlas. Executive summary eighth edition.  
219 2017: 7-12.
- 220 2. Feldman HA, Goldstein I, HatzichristoDG, Krane RJ, McKinlay JB. Impotence and its  
221 medical and psychosocial correlates: results of the Massachusetts Male Aging Study. *J*  
222 *Urol.* 1994; 151(1):54–61.
- 223 3. Penson DF, Latini DM, Lubeck DP, Wallace KL, Henning JM, Lue TF;  
224 Comprehensive Evaluation of Erectile Dysfunction (ExCEED) database. Do impotent  
225 men with diabetes have more severe erectile dysfunction and worse quality of life than  
226 the general population of impotent patients? Results from the Exploratory  
227 Comprehensive Evaluation of Erectile Dysfunction (ExCEED) database. *Diabetes*  
228 *Care.* 2003; 26(4):1093–1099.
- 229 4. LuCC, Jiann BP, Sun CC, Lam HC, Chu CH, Lee JK. Association of glycemic control  
230 with risk of erectile dysfunction in men with type 2 diabetes. *J Sex Med.* 2009;6  
231 (6):1719–1728.
- 232 5. Kolodny RC: Sexual dysfunction in diabetic females. *Diabetes* 20:557–559, 1971.
- 233 6. Griffith LS, Lustman PJ. Depression in women with diabetes, *Diabetes Spectrum*  
234 1997; 10: 216-23.
- 235 7. Garrow JS, Webster J. Quetelet's Index: (Wt/Ht<sup>2</sup>) as a measure of fatness. *Int J Obes*  
236 1985; 9: 147-153.
- 237 8. Bray GA. Obesity: Basic Consideration and clinical approaches. *Dis Mon* 1989; 35:  
238 449-537.
- 239 9. Rosen R, Brown C, Heiman J, Leiblum S, Meston C, Shabsigh R, Ferguson D,  
240 D'Agostino RJ. The Female Sexual Function Index (FSFI): A multidimensional self-  
241 report instrument for the assessment of female sexual function. *J Sex Marital Ther*  
242 2000; 26:191–208.
- 243 10. Meston CM. Validation of the Female Sexual Function Index (FSFI) in women with  
244 female orgasmic disorder and in women with hypoactive sexual desire disorder. *J Sex*  
245 *Marital Ther* 2003; 29:39–46.
- 246 11. Wiegel M, Meston C, Rosen R. The female sexual function index (FSFI): Cross-  
247 validation and development of clinical cutoff scores. *J Sex Marital Ther* 2005;31:1–20.

- 248 12. Unadike BC, Eregie A, Ohwovoriole AE. Prevalence and types of sexual dysfunction  
 249 amongst female with diabetes mellitus. *Pak J Med Sci.* 2009;2(2):257-260.
- 250 13. Paul Enzlin, Chantal Mathieu, Koen Demyttere. Diabetes and Female Sexual  
 251 Functioning: A State-of-the-Art. *Diabetes Spectrum* 2003.16:4.
- 252 14. Zahra Kashi, Forouzan Elyasi, Zahra Kashi, Bentolhoda Tasfieh, Adele Bahar,  
 253 Mohammad Khademloo. Sexual Dysfunction in Women with Type 2 Diabetes  
 254 Mellitus. *Iran J Med Sci.* 2015; 40; 3.
- 255 15. Shi YF, Shao XY, Lou QQ, Chen YJ, Zhou HJ, Zou JY. Study on female sexual  
 256 dysfunction in type 2 diabetic Chinese women. 

|          |          |
|----------|----------|
| abstract | abstract |
|----------|----------|
- |          |    |    |   |       |
|----------|----|----|---|-------|
| abstract | 20 | 20 |   |       |
|          |    |    | 1 | false |
| 1        |    |    |   |       |
- 257  
 258  
 259 Biomed Environ Sci. 2012; 25(5):557-61.  
 260 doi:10.3967/0895-3988.2012.05.009.
- 261 16. Ogbera AO, Chinenye S, Akinlade A, Eregie A, Awobusuyi J. Frequency and  
 262 correlates of sexual dysfunction in women with diabetes mellitus. *J Sex Med* 2009; 6:  
 263 3401–3406.
- 264 17. Bachmann GA, Avci D. Evaluation and management of female sexual dysfunction.  
 265 *Endocrinologist* 2004;14:337–45.
- 266 18. Fatemi SS, Tachavi SM. Evaluation of sexual function in women with type 2 diabetes  
 267 mellitus. *Diabetes Vasc Dis Res* 2009; 6: 38–39.
- 268 19. K Esposito, MI Maiorino, G Bellastella, F Giugliano, M Romano, D Giugliano.  
 269 Determinants of female sexual dysfunction in type 2 diabetes. *International Journal of*  
 270 *Impotence Research.* 2010. 22, 179–184.
- 271 20. Erol B, Tefekli A, Ozbey I, Salman F, Dincag N, Kadioglu A et al. Sexual dysfunction  
 272 in type II diabetic women: a comparative study. *J Sex Marital Ther* 2002; 28 (1): 55–  
 273 62.
- 274 21. Olarinoye J, Olarinoye A. Determinants of sexual function among women with type 2  
 275 diabetes in a Nigerian population. *J Sex Med* 2008; 5: 878–886.
- 276 22. Ishak IH, Low WY, and Othman S. Prevalence, risk factors and predictors of female  
 277 sexual dysfunction in a primary care setting: A survey finding. *J Sex Med* 2010;7:  
 278 3080–3087.

279 23. Veronelli A, MauriC, Zecchini B, et al. Sexual Dysfunction Is Frequent in  
280 Premenopausal Women with Diabetes, Obesity, and Hypothyroidism, and Correlates  
281 with Markers of Increased Cardiovascular Risk. A Preliminary Report. J Sex Med,  
282 2009; 6(6), 1561-8.

283

284

## Appendix I

285

### Female Sexual Function Index (FSFI)

286

287

288

289 SubjectIdentifier \_\_\_\_\_ 291 Date \_\_\_\_\_

292

293

294 INSTRUCTIONS: These questions ask about your sexual feelings and responses during  
295 the past 4weeks. Please answer the following questions as honestly and clearly as  
296 possible. Your responses will be kept completely confidential. In answering these  
297 questions the following definitions apply:

298

299 Sexual activity can include caressing, foreplay, masturbation and vaginal intercourse.

300

301 Sexual intercourse is defined as penile penetration (entry) of the vagina.

302

303 Sexual stimulation includes situations like foreplay with a partner, self-stimulation  
304 (masturbation), or sexual fantasy.

305

306 **CHECK ONLY ONE BOX PER QUESTION.**

307

308

309 Sexual desire or interest is a feeling that includes wanting to have a sexual  
310 experience, feeling receptive to a partner's sexual initiation, and thinking or  
311 fantasizing about having sex.

312

313

314 1. Over the past 4weeks, how **often** did you feel sexual desire or interest?

315

- 316  Almost always or always  
317  Most times (more than half the time)  
318  Sometimes (about half the time)  
319  A few times (less than half the time)  
320  Almost never or never

321

322 2. Over the past 4weeks, how would you rate your **level** (degree) of sexual desire or  
323 interest?

324

325  Very high

|     |          |
|-----|----------|
| 326 | High     |
| 327 | Moderate |
| 328 | Low      |
| 329 | Very low |
| 330 | or none  |

331 Sexual arousal is a feeling that includes both physical and mental aspects of sexual  
332 excitement. It may include feelings of warmth or tingling in the genitals, lubrication  
333 (wetness), or muscle contractions.  
334  
335

336 3. Over the past 4 weeks, how **often** did you feel sexually aroused ("turned on")  
337 During sexual activity or intercourse?  
338

- 339  No sexual activity  
340  Almost always or always  
341  Most times (more than half the time)  
342  Sometimes (about half the time)  
343  A few times (less than half the time)  
344  Almost never or never  
345

346 4. Over the past 4 weeks, how would you rate your **level** of sexual arousal ("turn on")  
347 during sexual activity or intercourse?  
348

- 349  No sexual activity  
350  Very high  
351  High  
352  Moderate  
353  Low  
354  Very low or none at all  
355

356 5. Over the past 4 weeks, how **confident** were you about becoming sexually aroused  
357 during sexual activity or intercourse?  
358

- 359  No sexual activity Very  
360  High confidence  
361  Moderate Confidence  
362  Low Confidence  
363  Very low or no confidence  
364

365 6. Over the past 4 weeks, how **often** have you been satisfied with your arousal  
366 (excitement) during sexual activity or intercourse?  
367

- 368  No sexual activity  
369  Almost always or always  
370  Most times (more than half the time)  
371  Sometimes (about half the time)  
372  A few times (less than half the time)  
373  Almost never or never

374 7. Over the past 4weeks, how **often** did you become lubricated ("wet") during sexual  
375 activity or intercourse?  
376

- 377  No sexual activity  
378  Almost always or always  
379  Most times (more than half the time)  
380  Sometimes (about half the time)  
381  A few times (less than half the time)  
382  Almost never or never  
383

384 8. Over the past4weeks, how **difficult** was it to become lubricated ("wet") during sexual  
385 activity or intercourse?  
386

- 387  No sexual activity  
388  Extremely difficult or impossible  
389  Very difficult  
390  Difficult  
391  Slightly difficult  
392  Not difficult  
393

394 9. Over the past 4weeks, how often did you **maintain** your lubrication ("wetness")  
395 until completion of sexual activity or intercourse?  
396

- 397  No sexual activity  
398  Almost always or always  
399  Most times (more than half the time)  
400  Sometimes (about half the time)  
401  A few times (less than half the time)  
402  Almost never or never  
403

404 10.Over the past 4weeks, how **difficult** was it to maintain your lubrication  
405 ("wetness") until completion of sexual activity or intercourse?  
406

- 407  No sexual activity  
408  Extremely difficult or impossible  
409  Very difficult  
410  Difficult  
411  Slightly difficult  
412  Not difficult

413 11. Over the past 4weeks,when you had sexual stimulation or intercourse, how  
414 **Often** did you reach orgasm (climax)?  
415

- 416  No sexual activity  
417  Almost always or always  
418  Most times (more than half the time)  
419  Sometimes (about half the time)  
420  A few times (less than half the time)  
421  Almost never or never  
422

423 12. Over the past 4weeks,when you had sexual stimulation or intercourse, how  
424 **difficult** was it for you to reach orgasm (climax)?  
425

- 426  No sexual activity  
427  Extremely difficult or impossible  
428  Very difficult  
429  Difficult  
430  Slightly difficult  
431  Not difficult  
432

433 13.Over the past 4weeks, how **satisfied** were you with your ability to reach orgasm  
434 (climax) during sexual activity or intercourse?  
435

- 436  No sexual activity  
437  Very satisfied  
438  Moderately satisfied  
439  About equally satisfied and dissatisfied  
440  Moderately dissatisfied  
441  Very dissatisfied  
442

443 14.Over the past 4weeks,how **satisfied** have you been with the amount of emotional  
444 closeness during sexual activity between you and your partner?  
445

- 446  No sexual activity  
447  Very satisfied  
448  Moderately satisfied  
449  About equally satisfied and dissatisfied  
450  Moderately dissatisfied  
451  Very dissatisfied



15. Over the past 4weeks, how **satisfied** have you been with your sexual relationship with your partner?

- Very satisfied
- Moderately satisfied
- About equally satisfied and dissatisfied
- Moderately dissatisfied
- Very dissatisfied

16. Over the past 4weeks, how **satisfied** have you been with your overall sexual life?

- Very satisfied
- Moderately satisfied
- About equally satisfied and dissatisfied
- Moderately dissatisfied
- Very dissatisfied

17. Over the past 4weeks, how **often** did you experience discomfort or pain during vaginal penetration?

- Did not attempt intercourse
- Almost always or always
- Most times (more than half the time)
- Sometimes (about half the time)
- A few times (less than half the time)
- Almost never or never

18. Over the past 4weeks, how **often** did you experience discomfort or pain following vaginal penetration?

- Did not attempt intercourse
- Almost always or always
- Most times (more than half the time)
- Sometimes (about half the time)
- A few times (less than half the time)
- Almost never or never

19. Over the past 4weeks, how would you rate your **level** (degree) of discomfort or pain during or following vaginal penetration?

- Did not attempt intercourse
- Very high
- High
- Moderate
- Low
- Very low or none at all

*Thank you for completing this questionnaire*  
Copyright © 2000 All Rights Reserved

## Appendix II

### CONSENT FORM

Serial number.....

Evaluation of female sexual function in type 2 diabetes mellitus patients in Umuahia with emphasis on its frequency and predictors

I,.....of.....  
.....hereby  
consent to participate in the study on Evaluation of female sexual function in type 2 diabetes mellitus patients in Umuahia with emphasis on its frequency and predictors

Dr.....has explained the nature of the study with its benefits and risks to me. I understand that the study is to be carried out solely for the purpose of Medical Research and I am willing to act as a volunteer for that purpose.

Date.....  
Signature.....  
Witness to signature.....

I confirm that I have explained to you the purpose and nature of the study and the risks involved, including the fact that any refusal to participate will not in any way affect your normal care by me or any other member of this institution. All information obtained in this study is strictly confidential.

Date.....

Signature.....
